# Supplementary material for: Effect of the dangling aromatic ring on neutral luminescent bis(phosphine) Cu(i)/Ag(i) complexes with the asymmetric pyridyl-tetrazolate ligands
Source: Royal Society of Chemistry journal article supplement (doi:10.1039/d2ra04684a), 2022-01-01
Supplement: d2ra04684a1.pdf [file d2ra04684a1.pdf]

## Supporting Information

### Effect of the dangling aromatic ring on neutral luminescent bis(phosphine) Cu(I)/Ag(I) complexes with the asymmetric pyridyl-tetrazolate ligands

Jing Xiang,<sup>a†</sup> Li-Xin Wang,<sup>a†</sup> Xu Zhang,<sup>\*a†</sup> De-Sheng Zhu,<sup>b</sup> Lei Wang,<sup>\*c</sup> Lu-Lu Liu,<sup>a</sup> Chi-Fai Leung<sup>\*d</sup> and Jing Xiang<sup>\*a</sup>

---

<sup>a</sup>College of Chemistry and Environmental Engineering, Yangtze University, Jingzhou 434020, HuBei, P. R. China. E-mail: [xiangjing@yangtzeu.edu.cn](mailto:xiangjing@yangtzeu.edu.cn).

<sup>b</sup>School of Physic and Optoelectronic Engineering, Yangtze University, Jingzhou 434020, HuBei, P. R. China.

<sup>c</sup>Anhui research academy of ecological and environmental sciences, Hefei, 230071, Anhui P. R. China.

<sup>d</sup>Department of Science and Environmental Studies, The Education University of Hong Kong, Hong Kong, China.

† These authors contribute equally.

## Table of contents

|            |                                                                                                                                                                                      |       |
|------------|--------------------------------------------------------------------------------------------------------------------------------------------------------------------------------------|-------|
|            | Experimental section                                                                                                                                                                 | S1-S2 |
| Figure S1  | The UV/vis spectra of HL <sup>1</sup> -HL <sup>3</sup> in MeOH solution.                                                                                                             | S2    |
| Figure S2  | The absorption spectra of <b>1</b> in various solvents.                                                                                                                              | S2    |
| Figure S3  | <sup>1</sup> H NMR of <b>5</b> in CDCl <sub>3</sub> .                                                                                                                                | S3    |
| Figure S4  | <sup>31</sup> P{ <sup>1</sup> H} NMR of <b>5</b> in CDCl <sub>3</sub> .                                                                                                              | S3    |
| Figure S5  | <sup>1</sup> H NMR of <b>6</b> in CDCl <sub>3</sub> .                                                                                                                                | S4    |
| Figure S6  | <sup>1</sup> H NMR of <b>7</b> in CDCl <sub>3</sub> .                                                                                                                                | S4    |
| Figure S7  | <sup>31</sup> P{ <sup>1</sup> H} NMR of <b>7</b> in CDCl <sub>3</sub> .                                                                                                              | S5    |
| Figure S8  | The π···π stacking interactions in <b>2</b> and <b>7</b>                                                                                                                             | S5    |
| Figure S9  | The Intermolecular H-bonding interactions in <b>2</b> and <b>7</b> .                                                                                                                 | S5    |
| Figure S10 | Emission spectra of <b>7</b> in the (a) CH <sub>2</sub> Cl <sub>2</sub> (b) in solid state (c) in low-temperature 77 K glassy media EtOH-MeOH (4:1, v/v) (λ <sub>ex</sub> = 355 nm). | S6    |
| Figure S11 | The CV of <b>2</b> in CH <sub>2</sub> Cl <sub>2</sub> containing 0.1 M [ <sup>n</sup> Bu <sub>4</sub> N]PF <sub>6</sub> with scan rate = 0.1 V/s.                                    | S6    |
| Table S1   | Summarized CVs data for compounds <b>1-6</b> in CH <sub>2</sub> Cl <sub>2</sub> .                                                                                                    | S6    |
| Table S2   | Crystal data and structure refinement details for compounds <b>2</b> and <b>7</b>                                                                                                    | S7    |

## Experimental section

**Physical Measurements and Instrumentation.**  $^1\text{H}$  NMR and  $^{31}\text{P}\{^1\text{H}\}$  NMR spectra were recorded on a Bruker AV300 (400 MHz) FT-NMR spectrometer. Chemical shifts ( $\delta$ , ppm) are reported relative to tetramethylsilane ( $\text{Me}_4\text{Si}$ ). Elemental analysis was performed on an ElementarVario MICRO Cube elemental analyzer. IR spectra of the solid samples as KBr discs were obtained within the range 4000–400  $\text{cm}^{-1}$  on an AVATAR 360 FTIR spectrometer. All of the electronic absorption spectra were recorded on a Hewlett–Packard 8453 or Hewlett–Packard 8452A diode-array spectrophotometer. Steady-state emission spectra were measured at room temperature and at 77 K on a Horiba JobinYvon Fluorolog-3-TCSPC spectrofluorometer. The solutions were rigorously degassed on a high-vacuum line in a two-compartment cell with not less than four successive freeze–pump–thaw cycles. The measurements at 77 K were carried out on dilute solutions of the samples in EtOH/MeOH (4:1, v/v) loaded in a quartz tube inside a quartz-walled Dewar flask that contained liquid nitrogen. Luminescence lifetimes were measured by using the time-correlated single-photon-counting (TCSPC) technique on a Fluorolog-3-TCSPC spectrofluorometer in a fast MCS mode with a Nano LED-375 LH excitation source, which had a peak excitation wavelength at 375 nm and a pulse width of less than 750 ps. The photon-counting data were analyzed on Horiba JobinYvon Decay Analysis Software.

**X-ray Crystallography.** The crystal structures were determined on an Oxford Diffraction Gemini S Ultra X-ray single-crystal diffractometer using graphite-monochromated Cu K $\alpha$  radiation ( $\lambda = 1.5418 \text{ \AA}$ ). The structures were solved by using the SHELXT-2014 program.<sup>1</sup> The Cu metal atoms and many of the non-hydrogen atoms were located according to the Intrinsic Phasing method. The positions of the other non-hydrogen atoms were located after refinement by full matrix least-squares by using the SHELXL-2018 program.<sup>2</sup> In the final stage of the least-squares refinement, all non-hydrogen atoms were refined anisotropically. H atoms were generated by SHELXL-2018 program. The positions of H atoms were calculated based on riding model with thermal parameters that were 1.2 times that of the associated C atoms and participated in the calculation of the final R indices. The structural analysis was performed using Olex 2.<sup>3</sup> Crystallographic data (including structure factors) of the structures reported in this paper have been deposited to the Cambridge Crystallographic Data Centre (CCDC) with the depository numbers CCDC 2178439-2178440 for **2** and **7**, respectively.

### Computational Details.

All the calculations were done by GAUSSIAN 09, version B.01.<sup>4</sup> The ground state and lowest triplet state structures of complexes **2** and **7** were optimized using B3LYP functional<sup>5</sup> and a mixed basis set of 6-31+G(d) (for C, H, N, P) and LANL2DZ<sup>6</sup> (for Cu). To reduce computation complexity, the phenyl rings of  $\text{PPh}_3$  ligand is replaced by methyl groups. Polarized Continuum Model<sup>7</sup> (PCM) was employed to account for the solvent effect. Frequency calculations were done after optimization and no imaginary frequencies were found. The X-ray crystal structures of the complexes were used without further optimization.

### References:

- [1] G. Sheldrick, SHELXT - Integrated space-group and crystal-structure determination, *Acta Crystallographica Section A*, 2015, **71**, 3-8.
- [2] G. Sheldrick, Crystal structure refinement with SHELXL, *Acta Crystallographica Section C*, 2015, **71**, 3-8.
- [3] Dolomanov, O.V., Bourhis, L.J., Gildea, R.J., Howard, J.A.K. & Puschmann, H., *J. Appl. Cryst.* 2009, **42**, 339-341.
- [4] M. J. Frisch, G. W. Trucks, H. B. Schlegel et al., *Gaussian 09*, Revision B.01, Gaussian, Inc., Wallingford

CT, 2009

- [5] (a) A. D. Becke, *J. Chem. Phys.* 1993, **98**, 5648-5652; (b) C. Lee, W. Yang, R. G. Parr, *Phys. Rev. B*, 1988, **37**, 785; (c) P. J. Stephens, F. J. Devlin, C. F. Chabalowski, M. J. Frisch, *J. Phys. Chem.* 1994, **98**, 11623 – 11627
- [6] (a) Y. Zhao and D. G. Truhlar, *Theor. Chem. Acc.*, 2008, **120**, 215–241; (b) A. Schäfer, H. Horn and R. Ahlrichs, *J. Chem. Phys.* 1992, **97**, 2571–2577; (c) W. R. Wadt and P. J. Hay, *J. Chem. Phys.* 1985, **82**, 284–298.
- [7] G. Scalmani and M. J. Frisch, *J. Chem. Phys.* 2010, **132**, 114110.

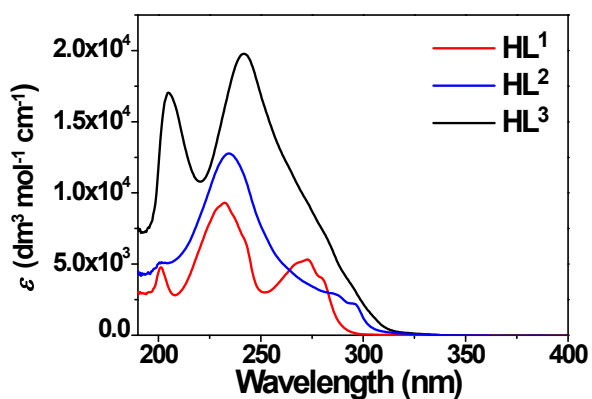

Fig. S1 The UV/vis spectra of HL<sup>1</sup>-HL<sup>3</sup> in MeOH solution.

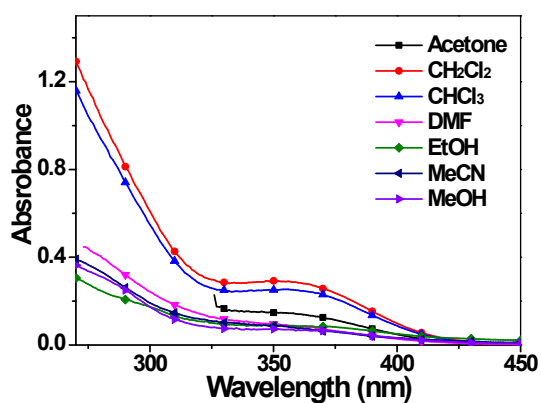

Fig. S2 The absorption spectra of 1 in various solvents.

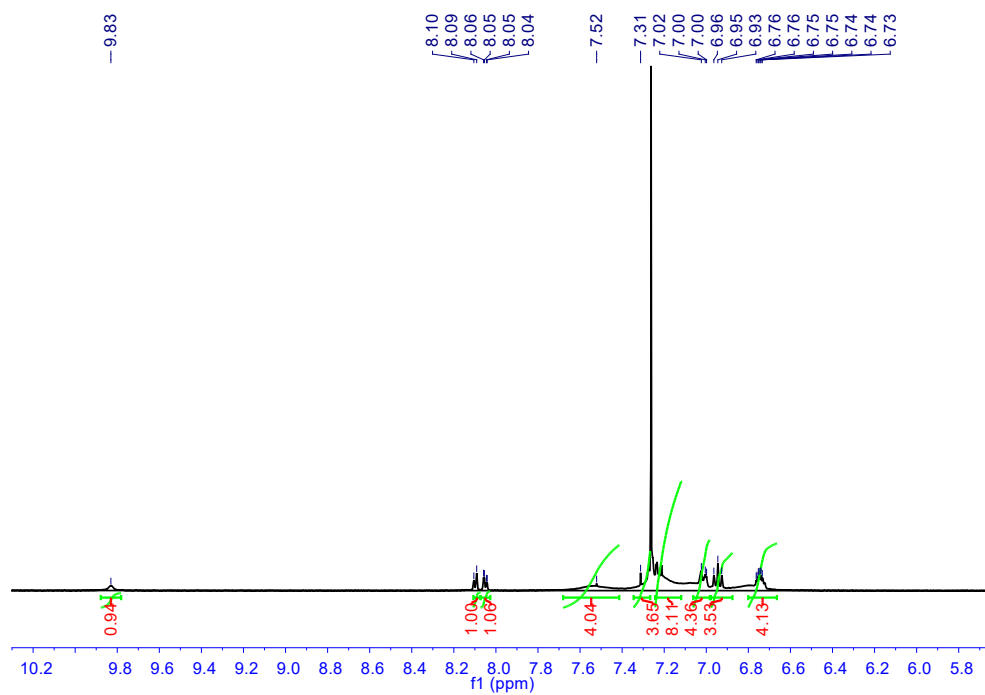

Fig. S3  $^1\text{H}$  NMR of **5** in  $\text{CDCl}_3$ .

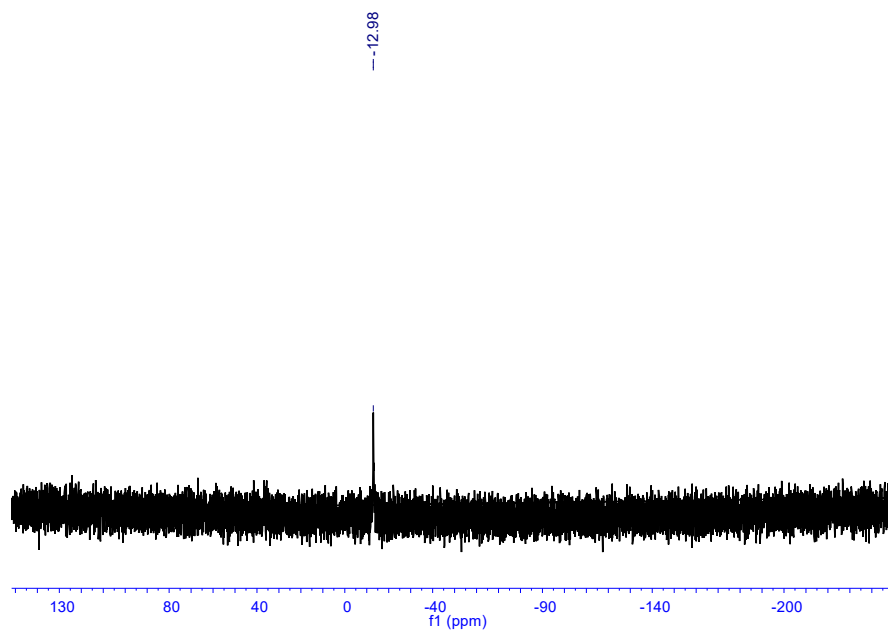

Fig. S4  $^{31}\text{P}\{^1\text{H}\}$  NMR of **5** in  $\text{CDCl}_3$ .

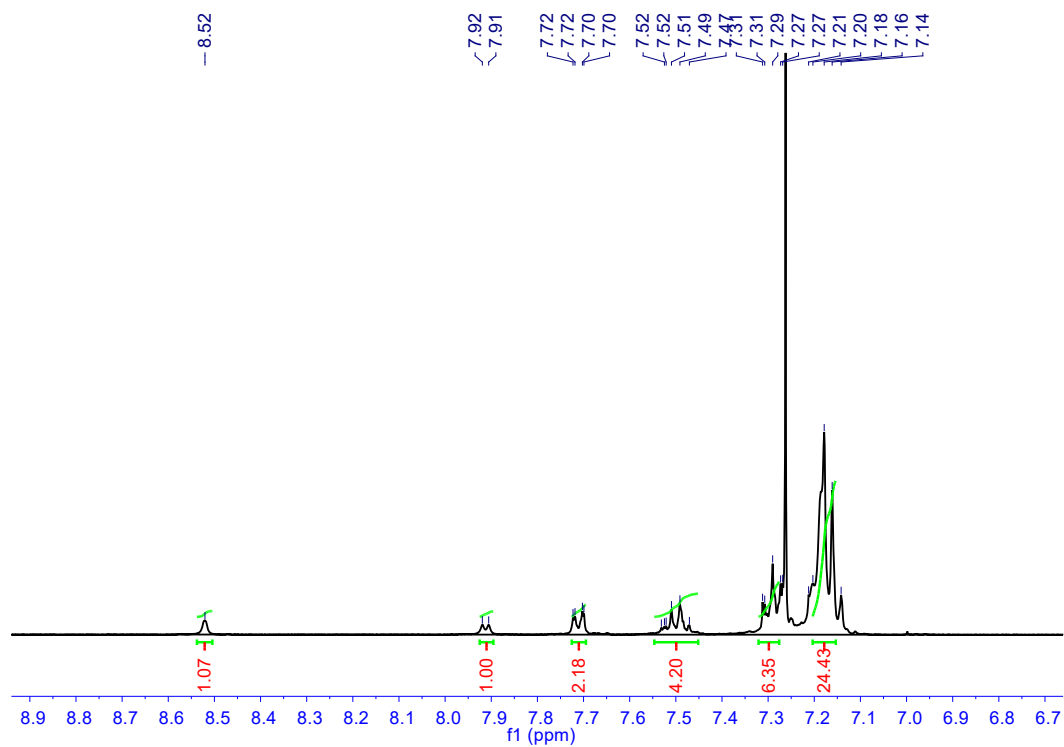

Fig. S5  $^1\text{H}$  NMR of **6** in  $\text{CDCl}_3$ .

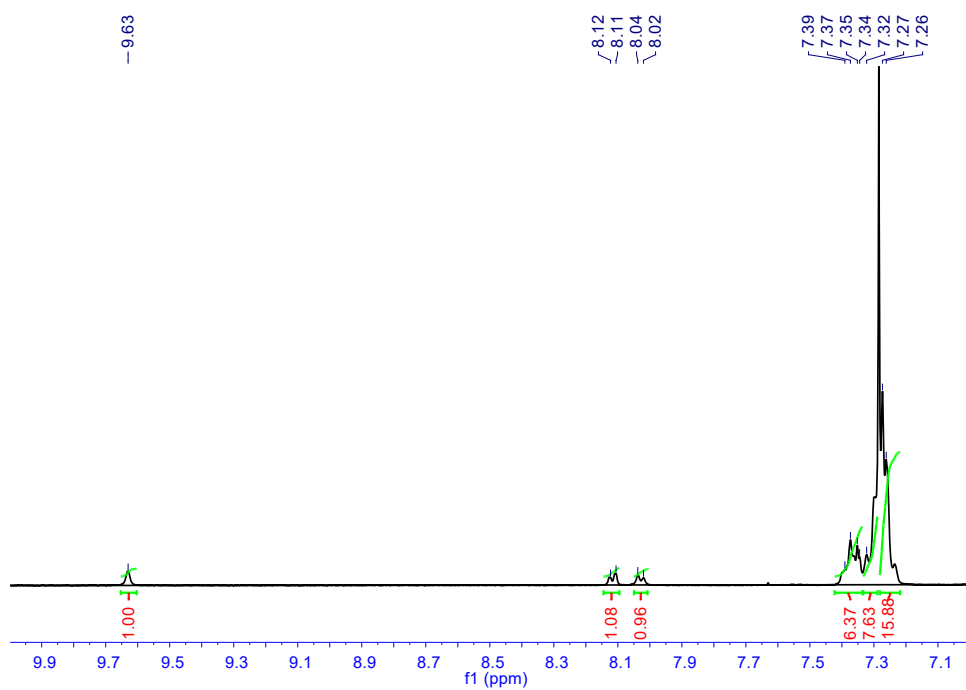

Fig. S6  $^1\text{H}$  NMR of **7** in  $\text{CDCl}_3$ .

-9.22

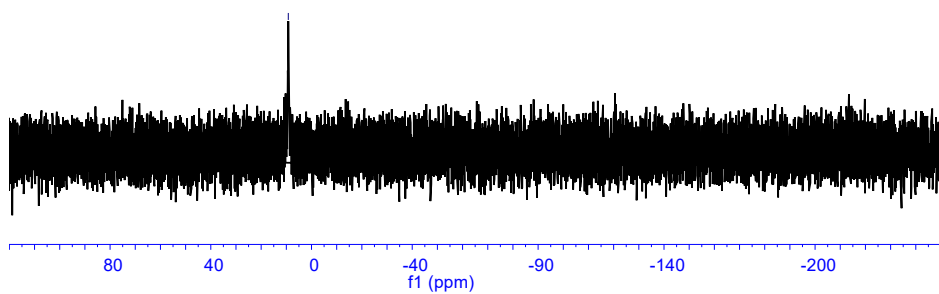

Fig. S7  $^{31}\text{P}\{^1\text{H}\}$  NMR of **7** in  $\text{CDCl}_3$ .

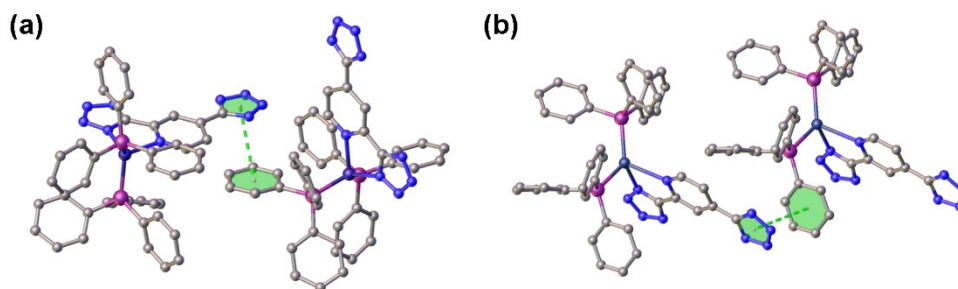

Fig. S8 The  $\pi\cdots\pi$  stacking interactions in **2(a)**, **7(b)**.

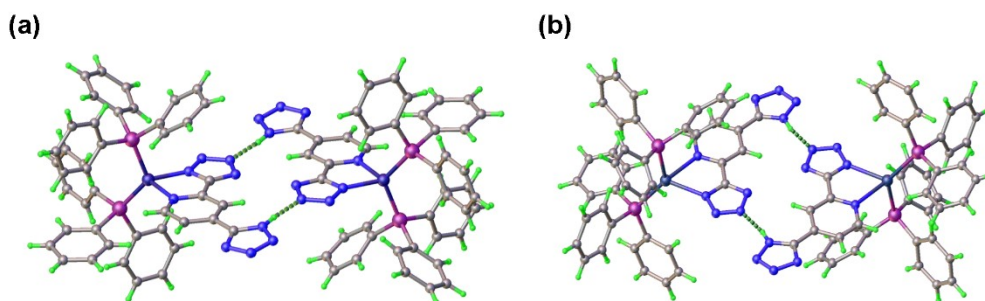

Fig. S9 The Intermolecular H-bonding interactions in **2(a)** and **7(b)**.

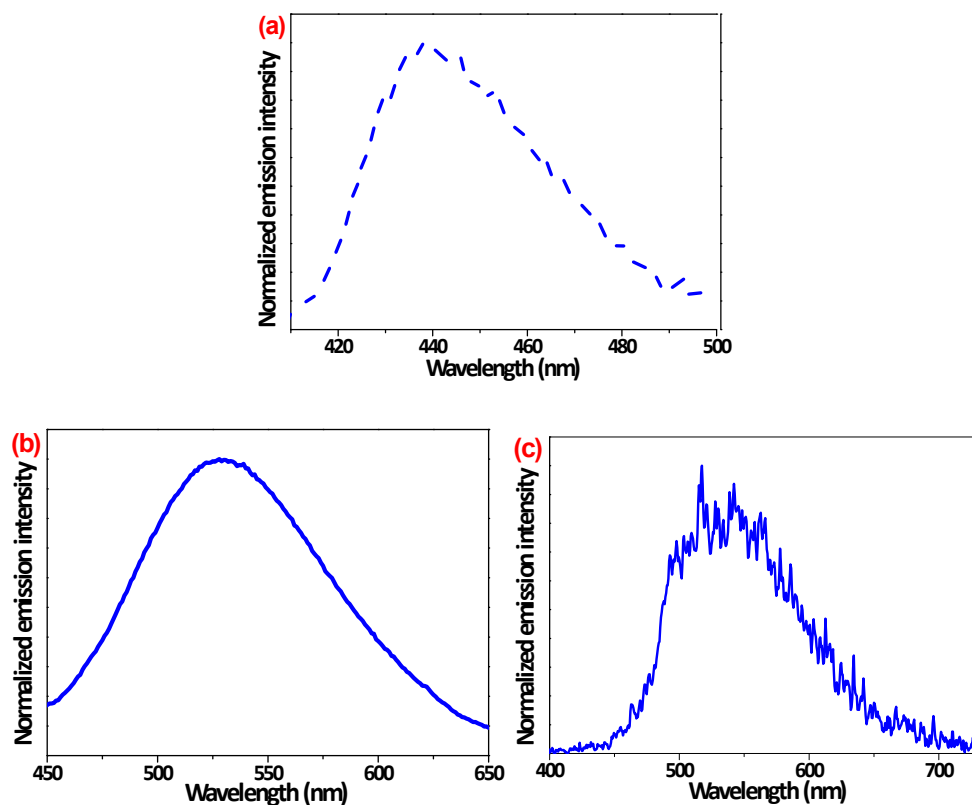

Fig. S10 Emission spectra of **7** (a) in the  $\text{CH}_2\text{Cl}_2$  at room temperature. (b) in solid state at room temperature. (c) in low-temperature 77 K glassy media EtOH-MeOH (4:1, v/v) ( $\lambda_{\text{ex}} = 380 \text{ nm}$ ).

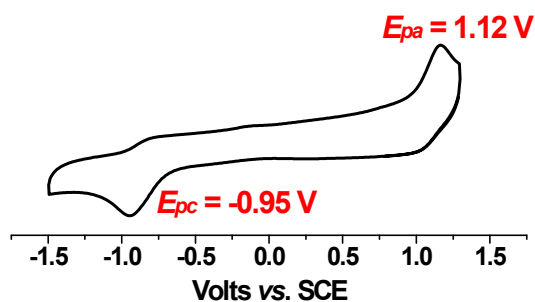

Fig. S11 The CV of **2** in  $\text{CH}_2\text{Cl}_2$  containing  $0.1 \text{ M}$   $[\text{nBu}_4\text{N}]\text{PF}_6$  with scan rate =  $0.1 \text{ V/s}$ .

**Table S1** Summarized CVs data for compounds **1-6** in  $\text{CH}_2\text{Cl}_2$ .

|          | $E_{\text{pa}}$ (ox) | $E_{\text{pc}}$ (red) |
|----------|----------------------|-----------------------|
| <b>1</b> | 1.06                 | -1.18                 |
| <b>2</b> | 1.12                 | -0.95                 |
| <b>3</b> | 1.13                 | -1.48                 |
| <b>4</b> | 1.12                 | -1.10                 |
| <b>5</b> | 1.05                 | -1.08                 |
| <b>6</b> | 1.02                 | -1.02                 |



**Table S2** Crystal data and structure refinement details for compounds **2** and **7**.

|                                                   | <b>2</b>                                                        | <b>7</b>                                                        |
|---------------------------------------------------|-----------------------------------------------------------------|-----------------------------------------------------------------|
| Formula                                           | C <sub>43</sub> H <sub>34</sub> CuN <sub>9</sub> P <sub>2</sub> | C <sub>43</sub> H <sub>34</sub> AgN <sub>9</sub> P <sub>2</sub> |
| <i>Mr</i>                                         | 802.30                                                          | 846.60                                                          |
| <i>T</i> /K                                       | 150.0 (1)                                                       | 100.0 (1)                                                       |
| Crystal syst                                      | Monoclinic                                                      | Monoclinic                                                      |
| Space group                                       | <i>P2<sub>1</sub>/n</i>                                         | <i>P2<sub>1</sub>/n</i>                                         |
| <i>a</i> /Å                                       | 18.9696 (2)                                                     | 19.2853 (9)                                                     |
| <i>b</i> /Å                                       | 10.5128 (1)                                                     | 10.8239 (4)                                                     |
| <i>c</i> /Å                                       | 19.2832 (2)                                                     | 19.3211 (8)                                                     |
| $\alpha$ , (°)                                    | 90                                                              | 90                                                              |
| $\beta$ , (°)                                     | 89.9860 (10)                                                    | 92.111 (4)                                                      |
| $\gamma$ , (°)                                    | 90                                                              | 90                                                              |
| <i>V</i> / Å <sup>3</sup>                         | 3845.53 (7)                                                     | 4030.4 (3)                                                      |
| <i>Z</i>                                          | 4                                                               | 4                                                               |
| $\rho_{\text{calcd}}$ , Mg m <sup>-3</sup>        | 1.353                                                           | 1.395                                                           |
| F(000)                                            | 1615                                                            | 1728                                                            |
| Collected refl.                                   | 41771                                                           | 26014                                                           |
| Unique refl.                                      | 7724                                                            | 7814                                                            |
| <i>R</i> (int)                                    | 0.060                                                           | 0.085                                                           |
| <i>R</i> <sub>1</sub> , <i>I</i> > 2σ( <i>I</i> ) | 0.077                                                           | 0.066                                                           |
| <i>wR</i> (all)                                   | 0.227                                                           | 0.210                                                           |
| GOF                                               | 1.07                                                            | 1.03                                                            |
| No. of par.                                       | 500                                                             | 484                                                             |
